# Supplementary material for: Metabonomic Analysis of Macrobrachium rosenbergii with Iron Prawn Syndrome (IPS)
Source: MDPI journal article supplement (doi:10.3390/fishes8040196), 2023-04-09
Supplement: s1 [file s1]

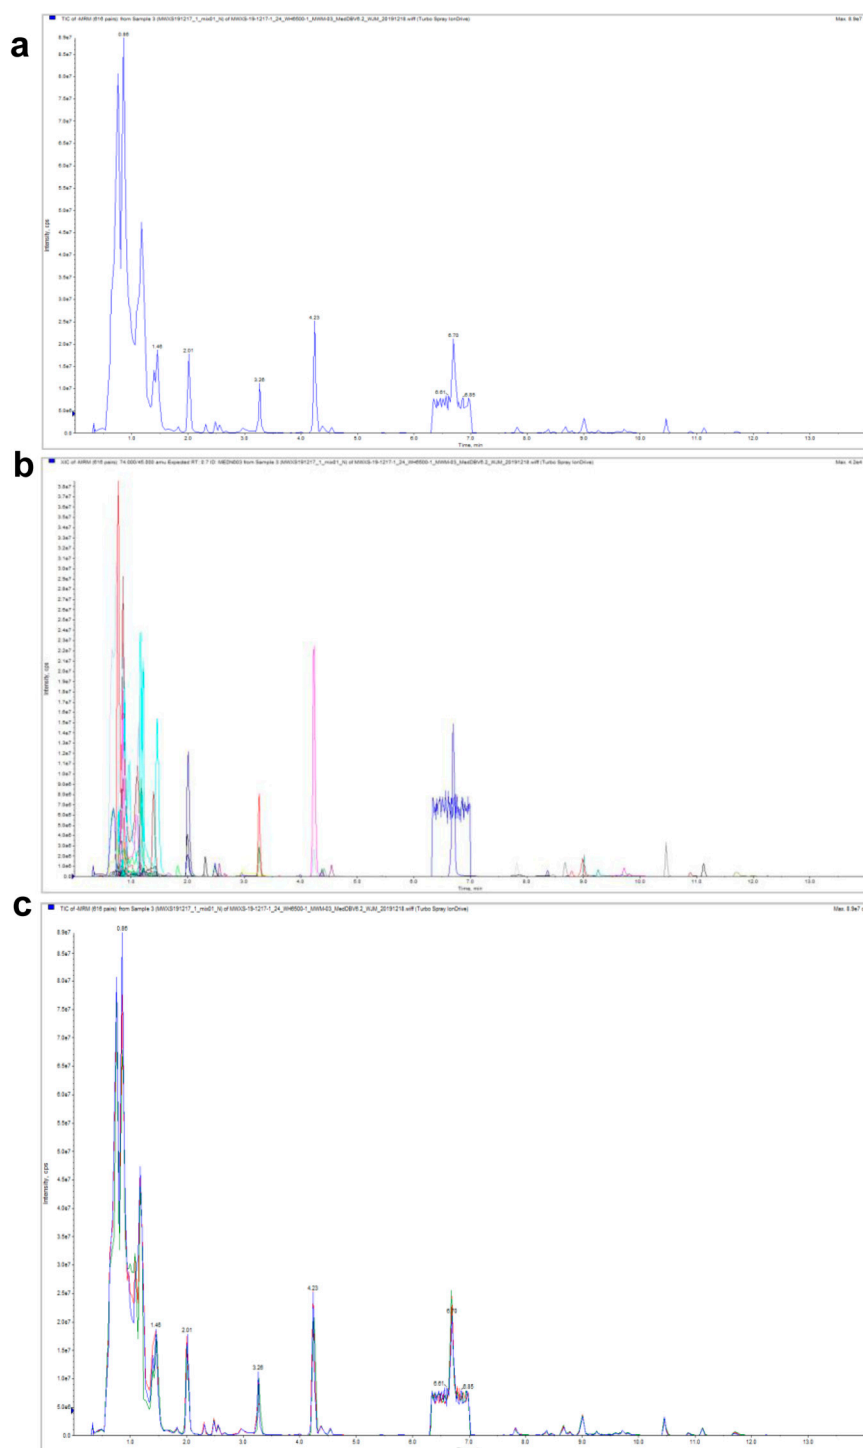

**Figure S1.** Superposition diagram of total ion flow diagram (TIC diagram, a) detected by mass spectrometry, MRM metabolite detection multi peak (b) and Tlc overlap diagram (c) of the mixed QC sample. The abscissa is the retention time (RT) of the metabolite detection, and the ordinate is the ion current intensity of ion detection (the intensity unit is CPS, count per second). The multi-reaction monitoring-mode MRM metabolite detection multi-peak diagram in the figure shows the substances that can be detected in the sample, and the chromatographic peaks of different colors represent different metabolites detected. The characteristic ions of each substance are screened through the triple quadrupole, and the signal strength (CPS) of the characteristic ions is obtained in the detector. The sample machine mass spectrometry file is opened with multiquant software to integrate and

[illegible]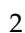

**Figure S2.** The integral correction chart and variability for metabolite **semi**-quantitative analysis. (a), integral correction chart of metabolite **semi**-quantitative analysis. The figure shows the **semi**-quantitative analysis integration correction results of randomly selected metabolites in different samples. The abscissa is the retention time (min) of metabolite detection, the ordinate is the ion current intensity (CPS) of a metabolite ion detection, and the peak area represents the relative content of the substance in the sample. (b), the overall metabolic difference between samples in each group and the variability between samples in the group. (c), the variability between different groups and among samples in the group. (d), Analytical metabolome data according to oppls-da model; we may draw a score map of each group and further show the differences between each group. The prediction parameters of the evaluation model include  $R^2X$ ,  $R^2Y$  and  $Q^2$ , wherein  $R^2X$  and  $R^2Y$ , respectively represent the interpretation rate of the built model to the X and Y matrices,  $Q^2$  represents the prediction ability of the model, the closer these three indicators are to 1, the more stable and reliable the model is.  $Q^2 > 0.5$  can be considered as an effective model, and  $Q^2 > 0.9$  is an excellent model. (e), the S-plot diagram of OPLS-DA; the abscissa represents the correlation coefficient between the principal component and the metabolite, and the ordinate represents the correlation coefficient between the principal component and the metabolite. The closer the metabolite is to the upper right corner and lower left corner, the more significant the difference is. The red point indicates that the VIP value of these metabolites is greater than or equal to 1, and the green point indicates that the VIP value of these metabolites is less than 1.

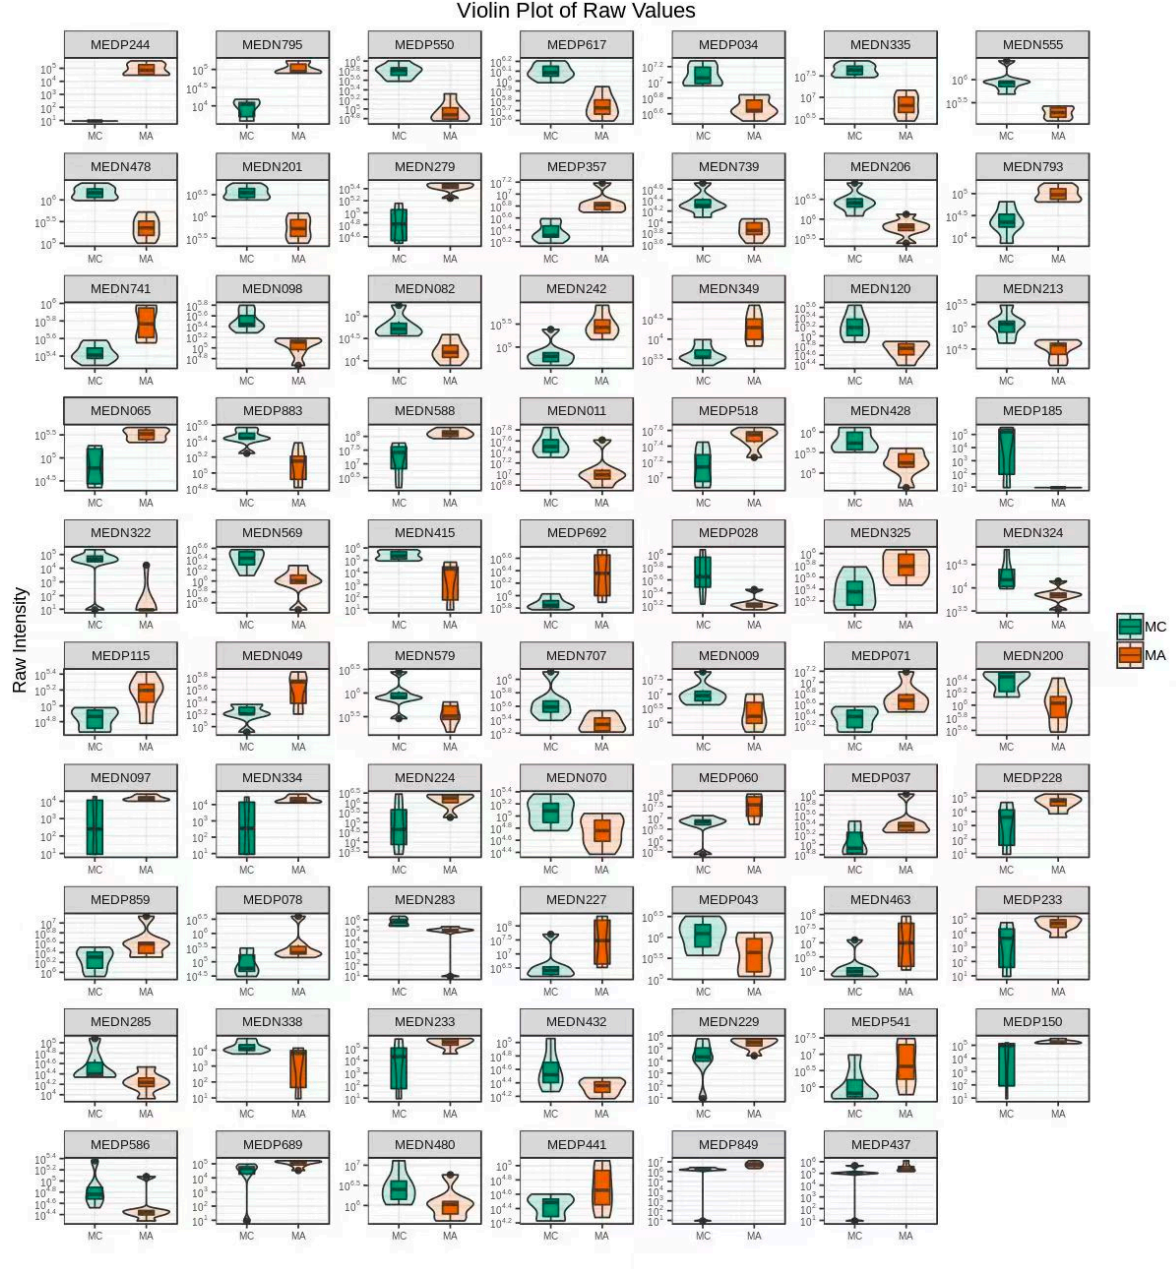

**Figure S3.** The data distribution and its probability density via the violin diagram. The middle box represents the quartile range, the thin line extending from it represents the 95% confidence interval, the black horizontal line in the middle is the median, and the outer shape represents the distribution density of the data.

# KEGG Classification

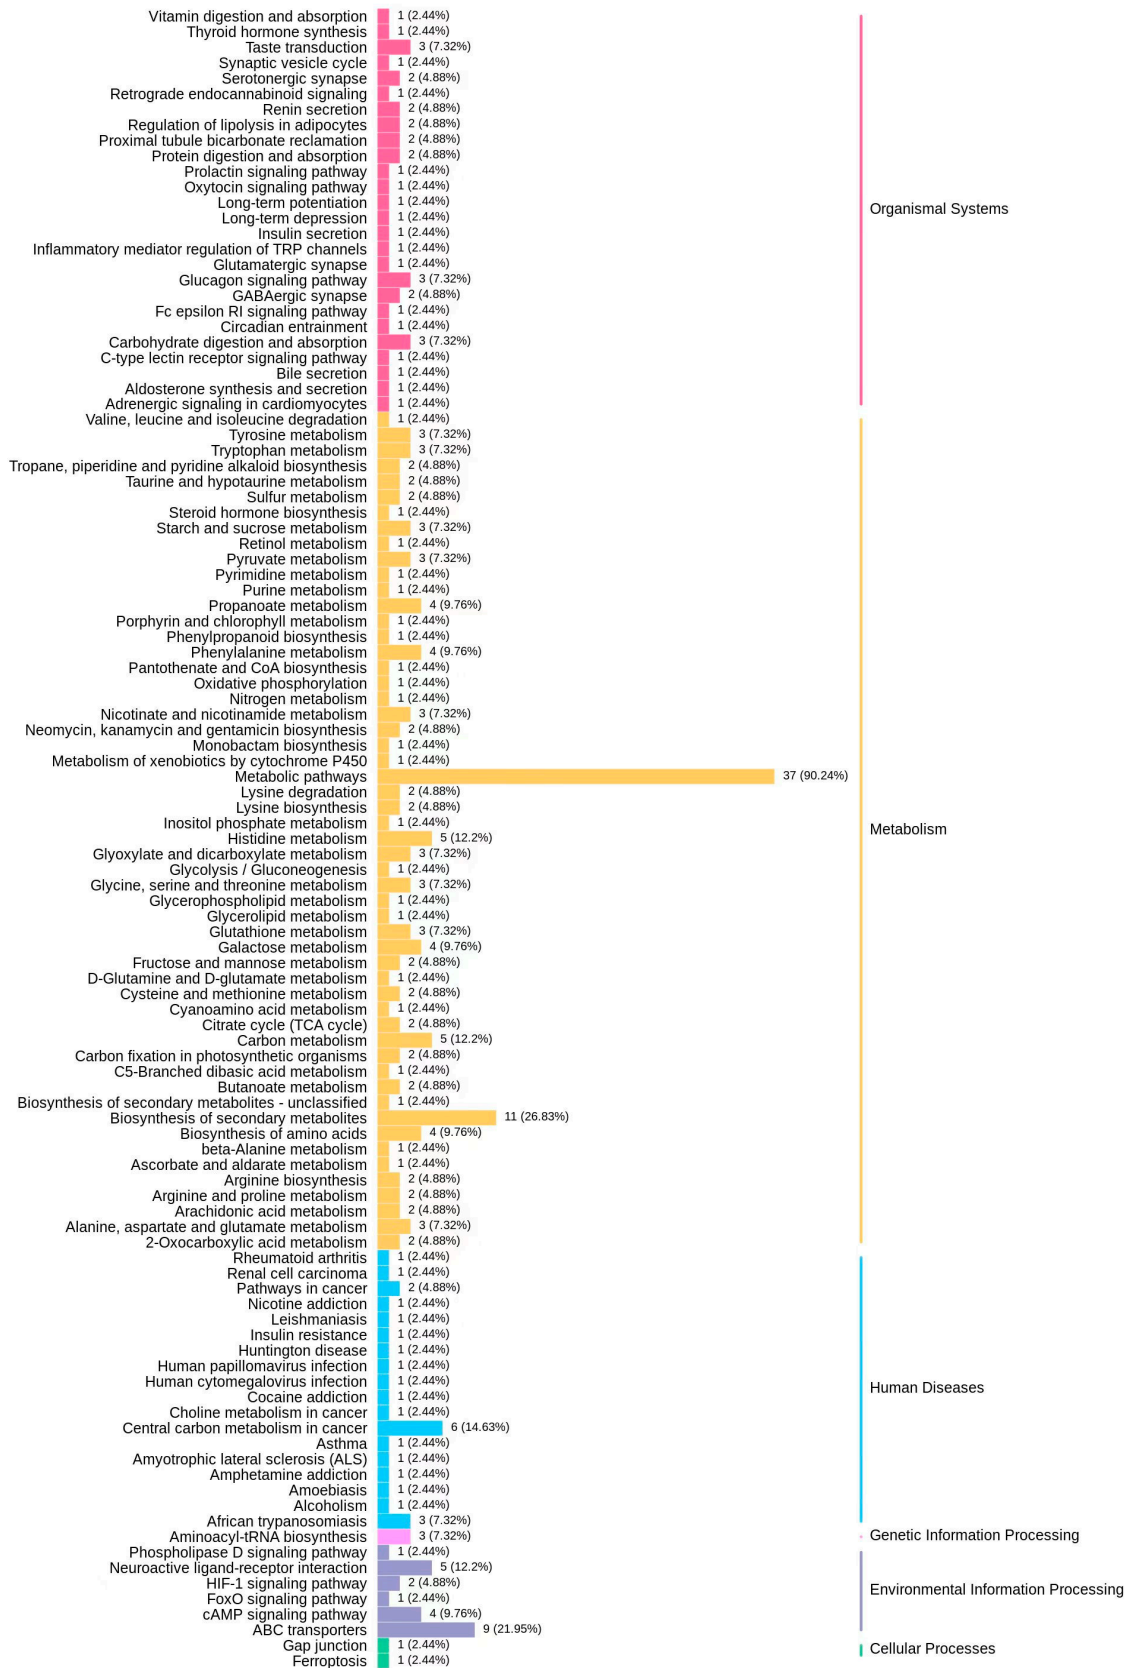

0 6 12 20 28 36 44 52 60 68 76 84 92  
Percent (%)

**Figure S4.** A metabolite with significant difference; the classification diagram is made according to the types of pathways in KEGG, according to the annotation results of KEGG. The ordinate is the name of the KEGG metabolic pathway, and the abscissa is the number of metabolites annotated to the pathway and its proportion to the total number of metabolites annotated.

**Table S1.** The numbers of the significant expression metabolites and partial calculation results of orthogonal partial least squares discriminant analysis (OPLS-DA) metabolite database mapping table.

| Index | Compounds                      | Class                             | VIP/ty<br>pe | KEG<br>G CID | HMDB          | Pubch<br>em CID |
|-------|--------------------------------|-----------------------------------|--------------|--------------|---------------|-----------------|
| 003   | MEDN<br>Glycine                | Amino<br>acid<br>metabolom<br>ics | 1.165        | C000<br>37   | HMDB00<br>123 | 750             |
| 005   | MEDN<br>L-<br>Threonine        | Amino<br>acid<br>metabolom<br>ics | 0.556        | C001<br>88   | HMDB00<br>167 | 6288            |
| 009   | MEDN<br>L-<br>Aspartic Acid    | Amino<br>acid<br>metabolom<br>ics | 1.489<br>↓   | C000<br>49   | HMDB00<br>191 | 5960            |
| 011   | MEDN<br>L-<br>Glutamic<br>Acid | Amino<br>acid<br>metabolom<br>ics | 1.675<br>↓   | C000<br>25   | HMDB00<br>148 | 33032           |
| 012   | MEDN<br>L-<br>Histidine        | Amino<br>acid<br>metabolom<br>ics | 0.059        | C001<br>35   | HMDB00<br>177 | 6274            |
| 013   | MEDN<br>L-<br>Isoleucine       | Amino<br>acid<br>metabolom<br>ics | 1.196        | C004<br>07   | HMDB00<br>172 | 6306            |
| 018   | MEDN<br>L-Serine               | Amino<br>acid<br>metabolom<br>ics | 0.310        | C000<br>65   | HMDB00<br>187 | 5951            |

| Index | Compounds                      | Class                            | VIP/typ | KEGG<br>G CID | HMDB      | Pubchem<br>CID |
|-------|--------------------------------|----------------------------------|---------|---------------|-----------|----------------|
|       |                                | Amino                            |         |               |           |                |
| 019   | MEDN L-Tryptophan              | acid metabolomics                | 0.519   | C00078        | HMDB00929 | 6305           |
|       |                                | Amino                            |         |               |           |                |
| 028   | MEDN 4-Hydroxy-L-Glutamic Acid | acid metabolomics                | 0.329   | C03079        | HMDB02273 | 5460078        |
|       |                                | Organic acid and its derivatives |         |               |           |                |
| 032   | MEDN Allantoin                 | c acid and its derivatives       | 0.193   | C01551        | HMDB00462 | 204            |

Note: PLS-DA based on the results of opsls-da, the obtained multivariable analysis of the variable importance in projection (VIP) of the opsls-da model.

**Table S2.** The shared and specific proteins in the detected tissues of the ‘iron prawn’ *M. rosenbergii*.

| Comparison group | Index | Compounds                                 | Class                             | L<br>og2FC | T<br>ype |
|------------------|-------|-------------------------------------------|-----------------------------------|------------|----------|
| MA vs. MB        | ME    | Epinephrine                               | Hormones                          | 19         | u        |
|                  | DP185 |                                           |                                   | .36        | p        |
|                  | ME    | 4-Pyridoxic Acid                          | Pyridine and pyridine derivatives | 16         | u        |
|                  | DP118 |                                           |                                   | .31        | p        |
|                  | ME    | N1-Acetylspermine                         | Organic acid and its derivatives  | 6.         | u        |
|                  | DP576 |                                           |                                   | 85         | p        |
|                  | ME    | 5-Aminovaleric Acid                       | Organic acid and its derivatives  | 3.         | u        |
|                  | DP297 |                                           |                                   | 18         | p        |
|                  | ME    | (5-L-Glutamyl)-L-Amino Acid               | Amino acid metabolomics           | 3.         | u        |
|                  | DP028 |                                           |                                   | 16         | p        |
|                  | ME    | Guanidineacetic Acid                      | Organic acid and its derivatives  | 2.         | u        |
|                  | DP313 |                                           |                                   | 97         | p        |
|                  | ME    | 8-Hydroxyguanosine                        | Nucleotide metabolomics           | 2.         | u        |
|                  | DP158 |                                           |                                   | 92         | p        |
|                  | ME    | Indoleacrylic acid                        | Organic acid and its derivatives  | 2.         | u        |
|                  | DN551 |                                           |                                   | 57         | p        |
|                  | ME    | Kinurenine                                | Organic acid and its derivatives  | 2.         | u        |
|                  | DN322 |                                           |                                   | 50         | p        |
|                  | ME    | D-Fructose-1,6-Biphosphate-Trisodium Salt | Carbohydrate metabolomics         | 2.         | u        |
|                  | DN485 |                                           |                                   | 04         | p        |
|                  | ME    | Lysopc 18:0                               | Lipids others phospholipid        | -          | d        |
|                  | DP342 |                                           |                                   | 2.00       | own      |
|                  | ME    | Cysteine glutathione disulfide            | Amino acid metabolomics           | -          | d        |
|                  | DN822 |                                           |                                   | 2.11       | own      |
|                  | ME    | Lysopc 17:0                               | Lipids others phospholipid        | -          | d        |
|                  | DP434 |                                           |                                   | 2.30       | own      |
|                  | ME    | Lysopc 20:2                               | Lipids others phospholipid        | -          | d        |
|                  | DP352 |                                           |                                   | 2.33       | own      |

|              |       |                                                                  |                      |              |       |     |
|--------------|-------|------------------------------------------------------------------|----------------------|--------------|-------|-----|
| MC<br>vs. MA | ME    | Lysopc 20:1                                                      | Lipids               | others       | -     | d   |
|              | DP350 |                                                                  | phospholipid         |              | 2.37  | own |
|              | ME    | Guanosine                                                        | 3',5'-Cyclic         | Nucleotide   | -     | d   |
|              | DN161 | Monophosphate                                                    | metabolomics         |              | 2.69  | own |
|              | ME    | Sn-Glycero-3-Phosphocholine                                      | Cholines             |              | -     | d   |
|              | DP442 |                                                                  |                      |              | 2.81  | own |
|              | ME    | Phe-Phe                                                          | Amino                | acid         | -     | d   |
|              | DP078 |                                                                  | metabolomics         |              | 2.88  | own |
|              | ME    | δ-Valerolactam                                                   | Pyridine             | and          | -     | d   |
|              | DP541 |                                                                  | pyridine derivatives |              | 3.00  | own |
|              | ME    | Ginkgoic acid                                                    | Organic              | acid and     | -     | d   |
|              | DN636 |                                                                  | its derivatives      |              | 3.07  | own |
|              | ME    | L- tyrosine methyl ester                                         | Amino                | acid         | -     | d   |
|              | DP664 |                                                                  | metabolomics         |              | 3.46  | own |
|              | ME    | N-Acetyl-5-Hydroxytryptamine                                     | Tryptamines          | and          | -     | d   |
|              | DP212 |                                                                  | its derivatives      |              | 3.66  | own |
|              | ME    | S-Sulfo-L-Cysteine                                               | Amino                | acid         | -     | d   |
|              | DN071 |                                                                  | metabolomics         |              | 11.86 | own |
|              | ME    | All-Trans-13,14-Dihydroretinol                                   | Coothersenzyme       |              | 13    | u   |
|              | DP244 |                                                                  | factor and vitamin   |              | .89   | p   |
|              | ME    | PGF2α [9α,11α,15S-trihydroxy-<br>prosta-5Z,13E-dien-1-oic acid]  | Oxidized lipid       |              | 3.    | u   |
|              | DN795 |                                                                  |                      |              | 54    | p   |
|              | ME    | D-Fructose                                                       | 6-Phosphate-         | Carbohydrate | 3.    | u   |
|              | DN463 | Disodium Salt                                                    | metabolomics         |              | 45    | p   |
|              | ME    | D-Glucose 6-Phosphate                                            | Carbohydrate         |              | 3.    | u   |
|              | DN227 |                                                                  | metabolomics         |              | 11    | p   |
|              | ME    | Methionine Sulfoxide                                             | Amino                | acid         | 3.    | u   |
|              | DP060 |                                                                  | metabolomics         |              | 00    | p   |
|              | ME    | Phe-Phe                                                          | Amino                | acid         | 2.    | u   |
|              | DP078 |                                                                  | metabolomics         |              | 79    | p   |
|              | ME    | D-Melezitose                                                     | Carbohydrate         |              | 2.    | u   |
|              | DP228 |                                                                  | metabolomics         |              | 51    | p   |
|              | ME    | PGD2 [9α,15S-dihydroxy-11-oxo-<br>prosta-5Z,13E-dien-1-oic acid] | Oxidized lipid       |              | 2.    | u   |
|              | DN349 |                                                                  |                      |              | 50    | p   |
|              | ME    | Glycerol 3-phosphate                                             | Lipids_fatty acids   |              | 2.    | u   |
|              | DN588 |                                                                  |                      |              | 32    | p   |
|              | ME    | δ-Valerolactam                                                   | Pyridine             | and          | 2.    | u   |
|              | DP541 |                                                                  | pyridine derivatives |              | 31    | p   |
|              | ME    | Raffinose                                                        | Carbohydrate         |              | 2.    | u   |
|              | DP233 |                                                                  | metabolomics         |              | 01    | p   |
|              | ME    | L-Aspartic Acid                                                  | Amino                | acid         | -     | d   |
|              | DN009 |                                                                  | metabolomics         |              | 2.23  | own |
|              | ME    | Citramalic Acid                                                  | Amino                | acid         | -     | d   |
|              | DN206 |                                                                  | metabolomics         |              | 2.26  | own |
|              | ME    | Hydroxyphenyllactic acid                                         | Carbohydrate         |              | -     | d   |
|              | DN555 |                                                                  | metabolomics         |              | 2.43  | own |
|              | ME    | Aminomalonic Acid                                                | Organic              | acid and     | -     | d   |
|              | DN478 |                                                                  | its derivatives      |              | 2.56  | own |
|              | ME    | Methylmalonic Acid                                               | Organic              | acid and     | -     | d   |
|              | DN335 |                                                                  | its derivatives      |              | 2.59  | own |
|              | ME    | Succinic Acid                                                    | Amino                | acid         | -     | d   |
|              | DN201 |                                                                  | metabolomics         |              | 2.59  | own |
|              | ME    | 18-Hydroxycorticosterone                                         | Lipids               |              | -     | d   |
|              | DP550 |                                                                  |                      |              | 2.72  | own |



|              |             |                                |                                        |            |          |
|--------------|-------------|--------------------------------|----------------------------------------|------------|----------|
| MC<br>vs. MD | ME<br>DN283 | 2-Hydroxybutanoic Acid         | Organic acid and<br>its derivatives    | -<br>2.85  | d<br>own |
|              | ME<br>DN415 | 2-(Formylamino)Benzoic Acid    | Benzene and<br>substituted derivatives | -<br>3.85  | d<br>own |
|              | ME<br>DN322 | Kinurenine                     | Organic acid and<br>its derivatives    | -<br>4.70  | d<br>own |
|              | ME<br>DP185 | Epinephrine                    | Hormones                               | -<br>14.08 | d<br>own |
|              | ME<br>DP244 | All-Trans-13,14-Dihydroretinol | Coothersenzyme<br>factor and vitamin   | 11<br>.58  | u<br>p   |
|              | ME<br>DP233 | Raffinose                      | Carbohydrate<br>metabolomics           | 2.<br>51   | u<br>p   |
|              | ME<br>DN224 | D-Trehalose                    | Carbohydrate<br>metabolomics           | 2.<br>50   | u<br>p   |
|              | ME<br>DN229 | Lactose                        | Carbohydrate<br>metabolomics           | 2.<br>41   | u<br>p   |
|              | ME<br>DP028 | (5-L-Glutamyl)-L-Amino Acid    | Amino acid<br>metabolomics             | 2.<br>34   | u<br>p   |
|              | ME<br>DN283 | 2-Hydroxybutanoic Acid         | Organic acid and<br>its derivatives    | -<br>2.04  | d<br>own |
| MD<br>vs. MB | ME<br>DP391 | Menaquinone                    | Coothersenzyme<br>factor and vitamin   | -<br>2.36  | d<br>own |
|              | ME<br>DN487 | Allysine                       | Organic acid and<br>its derivatives    | -<br>2.61  | d<br>own |
|              | ME<br>DN109 | Hyodeoxycholic Acid            | Bile acids                             | -<br>2.80  | d<br>own |
|              | ME<br>DP630 | Methyl jasmonate               | Lipids_fatty acids                     | -<br>2.96  | d<br>own |
|              | ME<br>DN225 | D-Xylose                       | Carbohydrate<br>metabolomics           | -<br>3.31  | d<br>own |
|              | ME<br>DP576 | N1-Acetylspermine              | Organic acid and<br>its derivatives    | -<br>10.21 | d<br>own |
|              | ME<br>DP576 | N1-Acetylspermine              | Organic acid and<br>its derivatives    | 15<br>.79  | u<br>p   |
|              | ME<br>DN551 | Indoleacrylic acid             | Organic acid and<br>its derivatives    | 5.<br>67   | u<br>p   |
|              | ME<br>DP313 | Guanidineacetic Acid           | Organic acid and<br>its derivatives    | 4.<br>01   | u<br>p   |
|              | ME<br>DP297 | 5-Aminovaleric Acid            | Organic acid and<br>its derivatives    | 3.<br>89   | u<br>p   |
|              | ME<br>DP384 | Isoxanthopterin                | Pteridines and<br>derivatives          | 3.<br>39   | u<br>p   |
|              | ME<br>DN225 | D-Xylose                       | Carbohydrate<br>metabolomics           | 3.<br>27   | u<br>p   |
|              | ME<br>DP689 | TranexamicAcid                 | Organic acid and<br>its derivatives    | 3.<br>06   | u<br>p   |
|              | ME<br>DP296 | 4-Guanidinobutyric Acid        | Organic acid and<br>its derivatives    | 3.<br>03   | u<br>p   |
|              | ME<br>DN109 | Hyodeoxycholic Acid            | Bile acids                             | 2.<br>97   | u<br>p   |
|              | ME<br>DP630 | Methyl jasmonate               | Lipids_fatty acids                     | 2.<br>90   | u<br>p   |
|              | ME<br>DP123 | Acetylcholine Chloride         | Cholines                               | 2.<br>78   | u<br>p   |

|       |                                |                    |      |     |
|-------|--------------------------------|--------------------|------|-----|
| ME    | 8-Hydroxyguanosine             | Nucleotide         | 2.   | u   |
| DP158 |                                | metabolomics       | 63   | p   |
| ME    | DI-Glyceraldehyde3-Phosphate   | Organic acid and   | 2.   | u   |
| DN480 |                                | its derivatives    | 60   | p   |
| ME    | Urocanic Acid                  | Organic acid and   | 2.   | u   |
| DP357 |                                | its derivatives    | 41   | p   |
| ME    | Creatine                       | Organic acid and   | 2.   | u   |
| DN305 |                                | its derivatives    | 30   | p   |
| ME    | 2-Methylbutyroylcarnitine      | Lipids_fatty acids | 2.   | u   |
| DP618 |                                |                    | 19   | p   |
| ME    | D-Glucose 6-Phosphate          | Carbohydrate       | 2.   | u   |
| DN227 |                                | metabolomics       | 13   | p   |
| ME    | D-Fructose 6-Phosphate-        | Carbohydrate       | 2.   | u   |
| DN463 | Disodium Salt                  | metabolomics       | 02   | p   |
| ME    | Lysope 18:1                    | Lipids others      | -    | d   |
| DN362 |                                | phospholipid       | 2.07 | own |
| ME    | Cysteine glutathione disulfide | Amino acid         | -    | d   |
| DN822 |                                | metabolomics       | 2.09 | own |
| ME    | Lysope 14:0                    | Lipids others      | -    | d   |
| DN368 |                                | phospholipid       | 2.16 | own |
| ME    | Lysopc 18:3                    | Lipids others      | -    | d   |
| DP498 |                                | phospholipid       | 2.16 | own |
| ME    | Lysopa 16:0                    | Lipids others      | -    | d   |
| DN372 |                                | phospholipid       | 2.23 | own |
| ME    | Methylmalonic Acid             | Organic acid and   | -    | d   |
| DN335 |                                | its derivatives    | 2.27 | own |
| ME    | Lysopc 18:2                    | Lipids others      | -    | d   |
| DP346 |                                | phospholipid       | 2.28 | own |
| ME    | Lysopc 16:0                    | Lipids others      | -    | d   |
| DP338 |                                | phospholipid       | 2.29 | own |
| ME    | Succinic Acid                  | Amino acid         | -    | d   |
| DN201 |                                | metabolomics       | 2.30 | own |
| ME    | Riboflavin                     | Coothersenzym      | -    | d   |
| DP250 |                                | factor and vitamin | 2.31 | own |
| ME    | Aminomalonic Acid              | Organic acid and   | -    | d   |
| DN478 |                                | its derivatives    | 2.31 | own |
| ME    | Lysopc 17:0                    | Lipids others      | -    | d   |
| DP434 |                                | phospholipid       | 2.33 | own |
| ME    | Lysope 16:0                    | Lipids others      | -    | d   |
| DN366 |                                | phospholipid       | 2.36 | own |
| ME    | L-Aspartic Acid                | Amino acid         | -    | d   |
| DN009 |                                | metabolomics       | 2.37 | own |
| ME    | Kinurenine                     | Organic acid and   | -    | d   |
| DN322 |                                | its derivatives    | 2.49 | own |
| ME    | LysoPE(16:1(9Z)-0:0)           | Lipids_fatty acids | -    | d   |
| DP638 |                                |                    | 2.51 | own |
| ME    | Lysopc 15:0                    | Lipids others      | -    | d   |
| DP494 |                                | phospholipid       | 2.57 | own |
| ME    | Ginkgoic acid                  | Organic acid and   | -    | d   |
| DN636 |                                | its derivatives    | 2.62 | own |
| ME    | Lysopc 18:1                    | Lipids others      | -    | d   |
| DP344 |                                | phospholipid       | 2.63 | own |
| ME    | PAF C-16                       | Lipids             | -    | d   |
| DP537 |                                |                    | 2.75 | own |

|       |                              |                 |        |       |     |
|-------|------------------------------|-----------------|--------|-------|-----|
| ME    | Lysopc 18:0                  | Lipids          | others | -     | d   |
| DP342 |                              | phospholipid    |        | 2.78  | own |
| ME    | Lysopc 14:0                  | Lipids          | others | -     | d   |
| DP336 |                              | phospholipid    |        | 3.00  | own |
| ME    | 18-Hydroxycorticosterone     | Lipids          |        | -     | d   |
| DP550 |                              |                 |        | 3.01  | own |
| ME    | Lysopc 20:2                  | Lipids          | others | -     | d   |
| DP352 |                              | phospholipid    |        | 3.14  | own |
| ME    | Lysopc 16:1                  | Lipids          | others | -     | d   |
| DP340 |                              | phospholipid    |        | 3.16  | own |
| ME    | N-Acetyl-5-Hydroxytryptamine | Tryptamines     | and    | -     | d   |
| DP212 |                              | its derivatives |        | 3.40  | own |
| ME    | N6-Succinyl Adenosine        | Nucleotide      |        | -     | d   |
| DN428 |                              | metabolomics    |        | 4.07  | own |
| ME    | Lysopc 20:1                  | Lipids          | others | -     | d   |
| DP350 |                              | phospholipid    |        | 4.44  | own |
| ME    | S-Sulfo-L-Cysteine           | Amino           | acid   | -     | d   |
| DN071 |                              | metabolomics    |        | 12.61 | own |
