# Supplementary material for: Metabonomic Analysis of Macrobrachium rosenbergii with Iron Prawn Syndrome (IPS)
Source: MDPI journal article supplement (doi:10.3390/fishes8040196), 2023-04-09
Supplement: s1 [file s1]

Archive with 1 entries (1 files):
- fishes-2262660-supplementary.pdf
